# Supplementary material for: Single silicon-doped CNT as a metal-free electrode for robust nitric oxide reduction utilizing a Lewis base site: an ingenious electronic “Reflux-Feedback” mechanism
Source: Royal Society of Chemistry journal article supplement (doi:10.1039/d3cp00677h), 2023-01-01
Supplement: d3cp00677h1.pdf [file d3cp00677h1.pdf]

## ***Supporting Information***

**Single silicon-doped CNT as a metal-free electrode for robust nitric oxide reduction utilizing a**

**Lewis base site: An ingenious electronic “Reflux-Feedback” mechanism**

Lei Yang, Jiake Fan, Weihua Zhu\*

*Institute for Computation in Molecular and Materials Science, School of Chemistry and Chemical  
Engineering, Nanjing University of Science and Technology, Nanjing 210094, China*

---

\* Corresponding author. E-mail: zhuwh@njust.edu.cn

**Figure S1.** The transition state search of NORR on Si-CNT(10, 0).

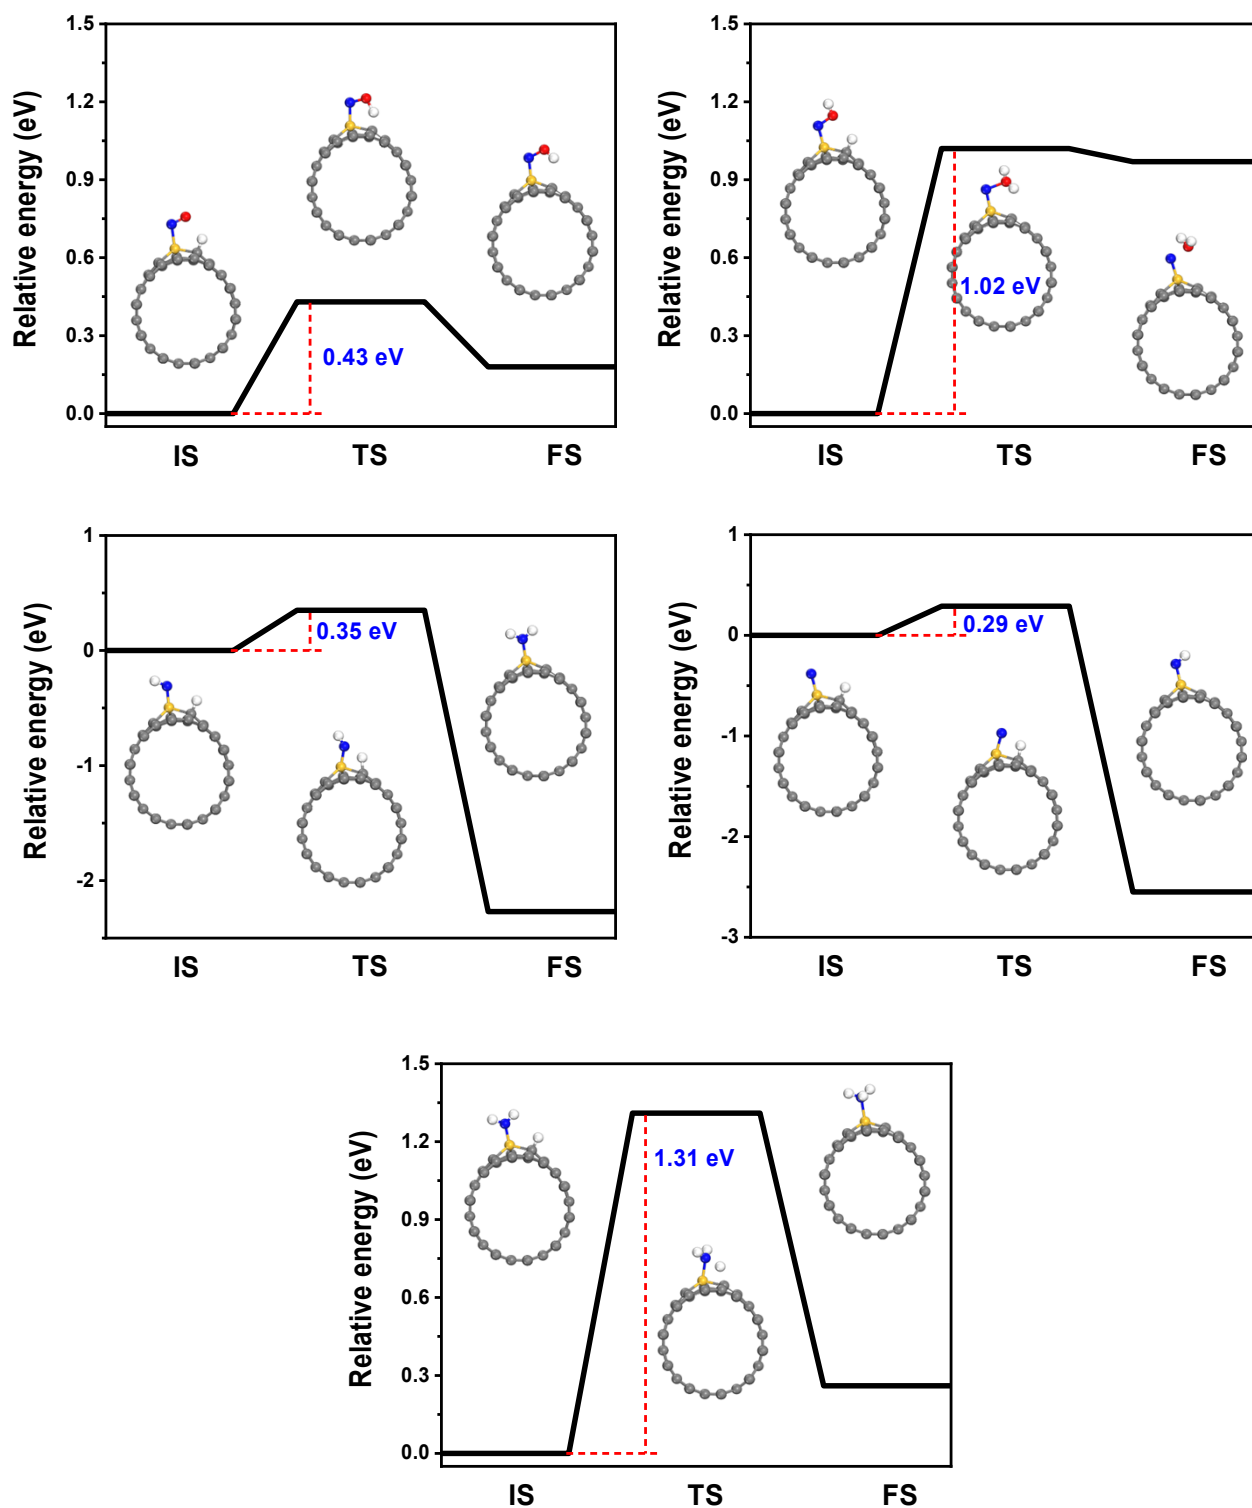

**Table S1.** The adsorption energy of NO with O-end, N-end and side on adsorption modes. (eV)

| Systems       | O-end | N-end | Side on |
|---------------|-------|-------|---------|
| Si-G          | -0.34 | -0.80 |         |
| Si-CNT(6, 0)  | -0.05 | -0.96 |         |
| Si-CNT(7, 0)  | -0.02 | -0.90 |         |
| Si-CNT(8, 0)  | 0.00  | -0.89 |         |
| Si-CNT(9, 0)  | -0.05 | -0.85 |         |
| Si-CNT(10, 0) | -0.08 | -0.83 |         |
| Si-CNT(11, 0) | -0.08 | -0.83 |         |
| Si-CNT(12, 0) | -0.07 | -0.81 |         |

**Table S2.** The adsorption free energy changes of NORR on Si-CNT(10, 0) with and without solvent effect. (eV)

|                  | With solvent effect | Without solvent effect |
|------------------|---------------------|------------------------|
| *NO              | -0.88               | -0.85                  |
| *NOH             | -0.82               | -0.75                  |
| *N               | -0.67               | -0.57                  |
| *NH              | -2.77               | -2.60                  |
| *NH <sub>2</sub> | -4.70               | -4.90                  |
| *NH <sub>3</sub> | -4.48               | -4.64                  |
| $U_L$            | -0.22               | -0.25                  |
